# Supplementary material for: Predicting the mineral composition of dust aerosols – Part 1: Representing key processes
Source: Copernicus journal article supplement (doi:10.5194/acp-15-11593-2015), 2015-10-21
Supplement: Supplementary file [file acp-15-11593-2015-supplement-title-page.pdf › acp-15-11593-2015-supplement-title-page.pdf]

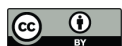

## *Supplement of*

# **Predicting the mineral composition of dust aerosols – Part 1: Representing key processes**

**J. P. Perlwitz et al.**

*Correspondence to:* J. P. Perlwitz ([jan.p.perlwitz@nasa.gov](mailto:jan.p.perlwitz@nasa.gov))

- [acp-15-11593-2015-supplement-title-page.pdf](#)
- [mineralfractionsatmission\\_AMFmethod\\_NASAGISS\\_201412\\_144x90.nc](#)
- [supplement.pdf](#)

The copyright of individual parts of the supplement might differ from the CC-BY 3.0 licence.
